# Supplementary material
Source: publisher figshare collection journal article supplement (https://frontiersin.figshare.com/ndownloader/files/28670790)
Supplement: Supplementary file [file 28670790]

## **SUPPLEMENTARY INFORMATION**

### **ANLN ENHANCES TRIPLE-NEGATIVE BREAST CANCER STEMNESS THROUGH TWIST1 AND BMP2 AND PROMOTES ITS SPHEROID GROWTH**

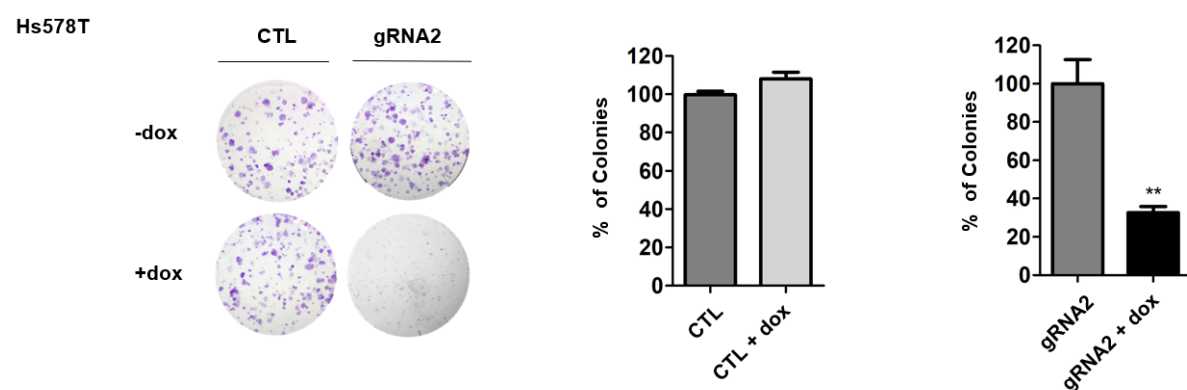

**Supplementary Figure 1. ANLN depletion suppresses colony formation in Hs578T cells.**

Hs578T cells expressing tet-on ANLN were treated or CTL gRNA were treated with dox (100 ng/ml) for 7 days. Cells were then cultured for colony formation assay for 10 days. Representative images are shown. Colony number was counted and depicted in bar graph. Error bars, mean  $\pm$  SEM of 3 independent experiments. \*\*\*,  $p < 0.001$ .

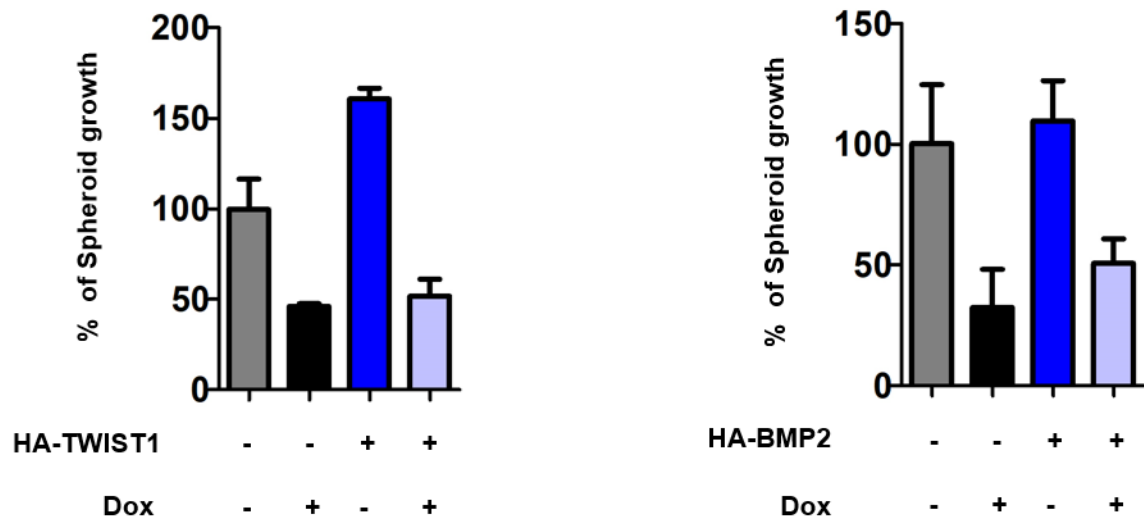

**Supplementary Figure 2. TWIST1 and BMP2 do not rescue spheroid growth of ANLN-depleted cells.**

BT549 cells expressing HA-twist1, HA-bmp2 or control vector were infected with tet-on ANLN gRNA1. Cells were treated with dox (100 ng/ml) for 7 days, and then cultured in 3D for 7 to 9 days followed by 3D cell titer-Glo assay. Bar graphs depict relative spheroid growth of BT549. Error bars, mean  $\pm$  SEM of 2 independent experiments. \*,  $p < 0.05$ .
